# Supplementary material for: Functional organic click-materials: application in phosphorescent organic light emitting diodes
Source: Royal Society of Chemistry journal article supplement (doi:10.1039/c6ra28212a), 2017-01-01
Supplement: c6ra28212a1.pdf [file c6ra28212a1.pdf]

# Functional Organic Click-Materials: Application in Phosphorescent Organic Light Emitting Diodes

Paul Kautny,<sup>\*a</sup> Chenyang Zhao,<sup>b</sup> Thomas Kader,<sup>a</sup> Berthold Stöger,<sup>c</sup> Ernst Horkel,<sup>a</sup>  
Jiangshan Chen,<sup>\*b</sup> Dongge Ma,<sup>b</sup> Johannes Fröhlich<sup>a</sup> and Daniel Lumpi<sup>a</sup>

## Supporting Information

<sup>a</sup> Institute of Applied Synthetic Chemistry, TU Wien, Getreidemarkt 9/163, A-1060 Vienna, Austria; E-mail: paul.kautny@tuwien.ac.at

<sup>b</sup> State Key Laboratory of Polymer Physics and Chemistry, Changchun Institute of Applied Chemistry, Chinese Academy of Sciences, Changchun, 130022, China; E-mail: jschen@ciac.ac.cn

<sup>c</sup> Institute of Chemical Technologies and Analytics, TU Wien, Getreidemarkt 9/164, A-1060 Vienna, Austria

# NMR spectra

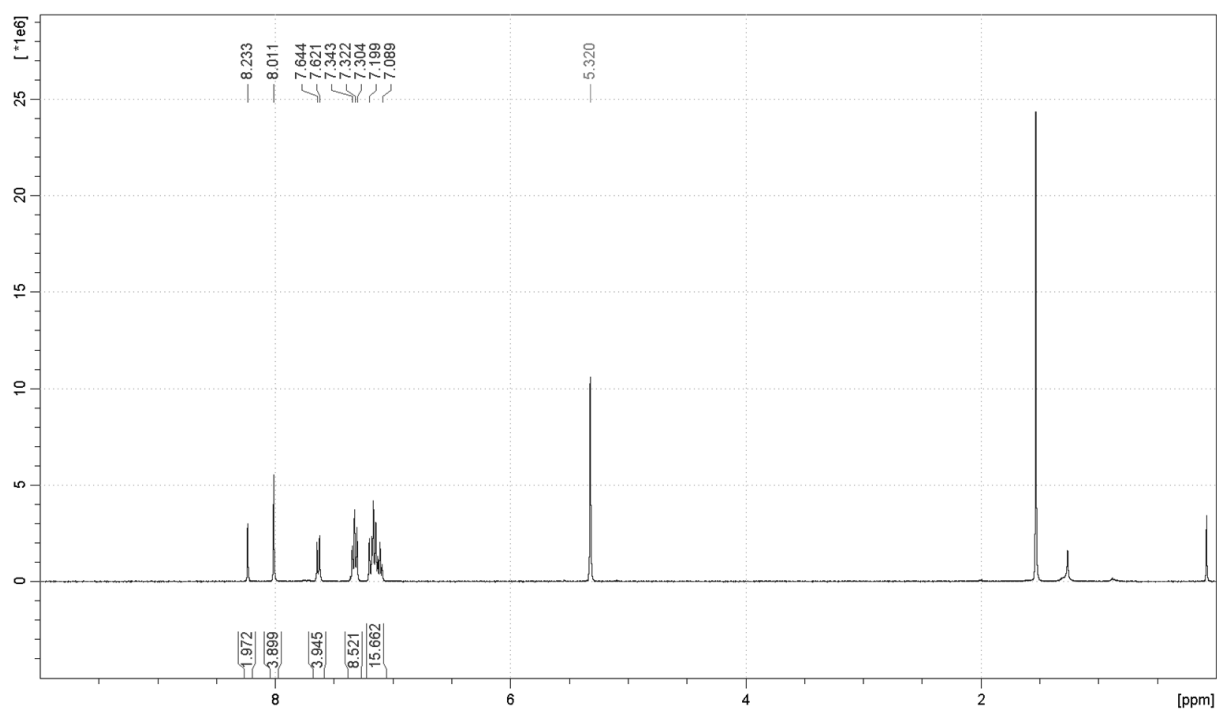

Figure S 1. Proton NMR spectrum of compound 3a.

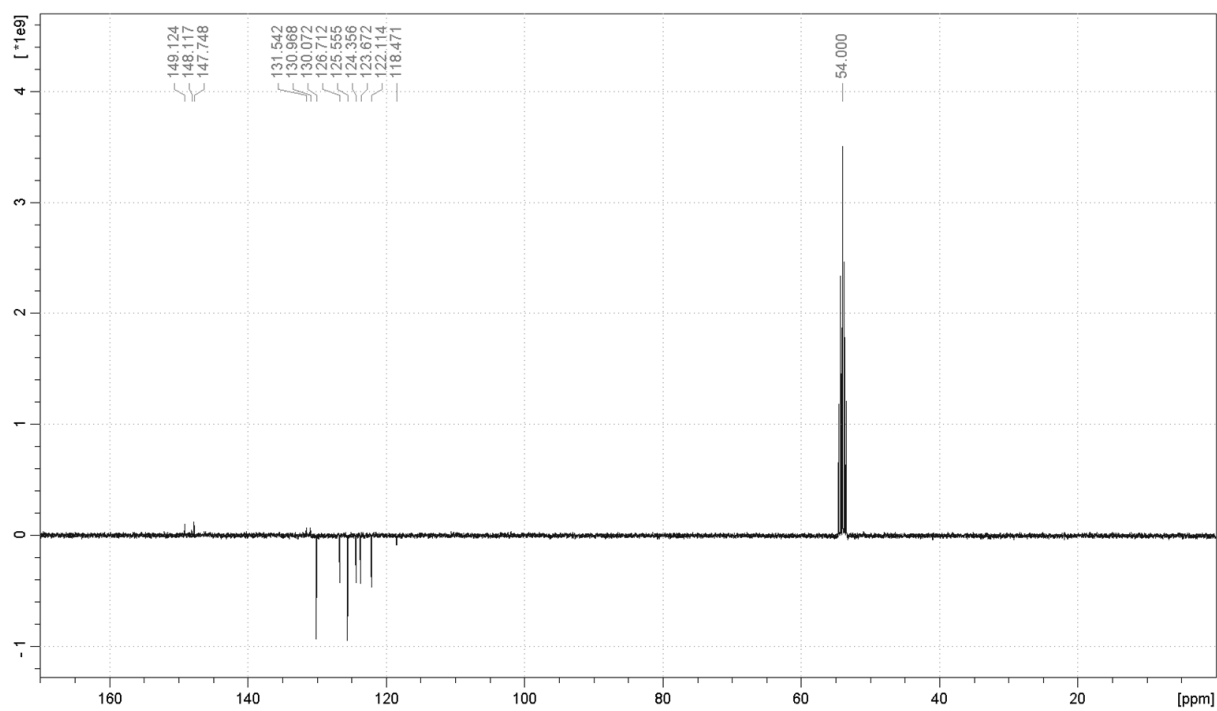

Figure S 2. Carbon NMR spectrum of compound 3a.

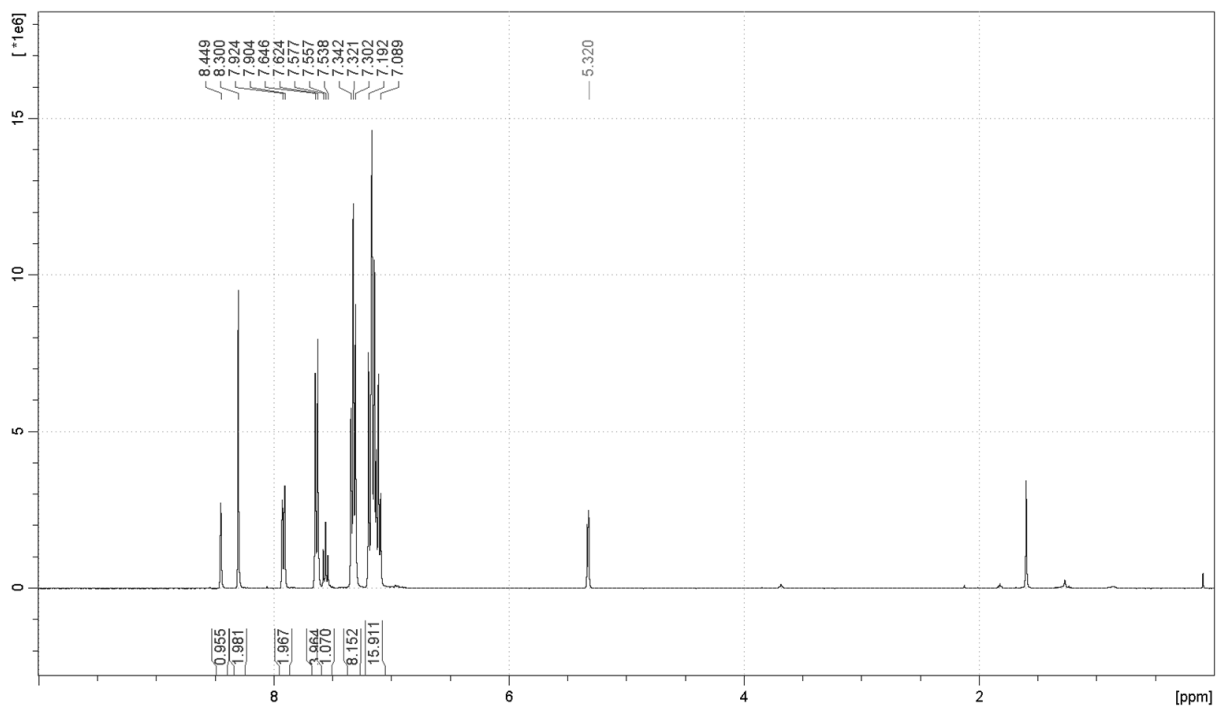

Figure S 3. Proton NMR spectrum of compound 3b.

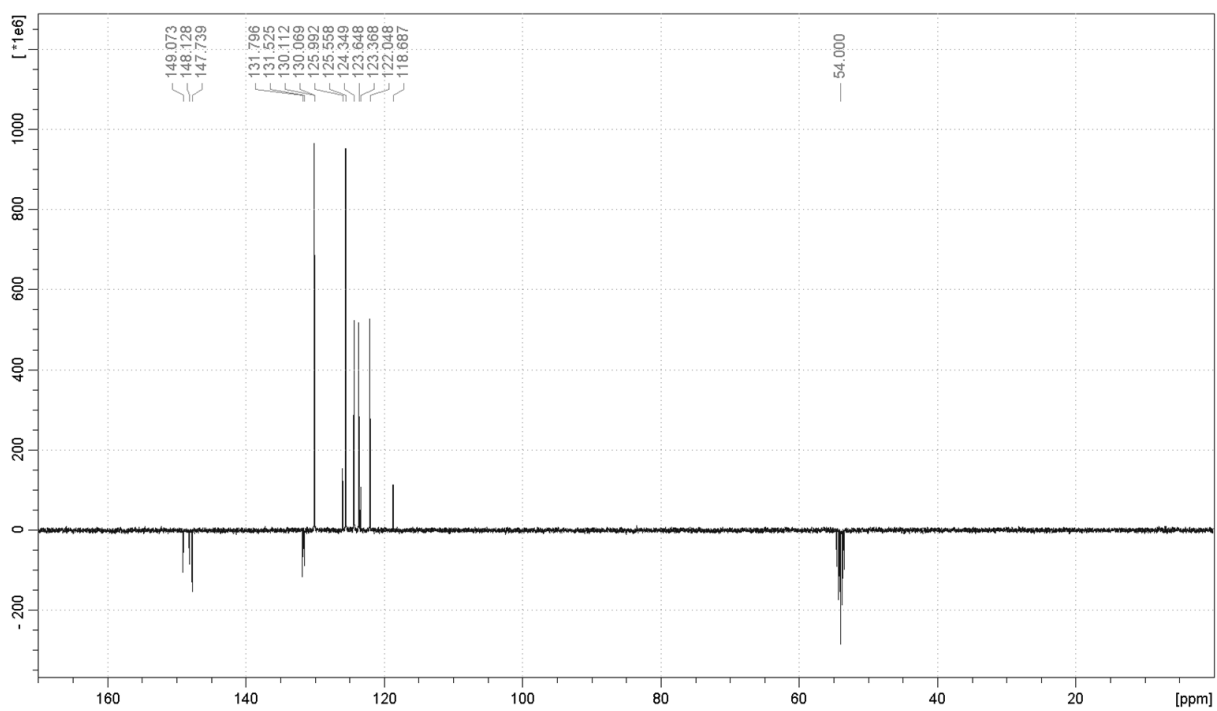

Figure S 4. Carbon NMR spectrum of compound 3b.

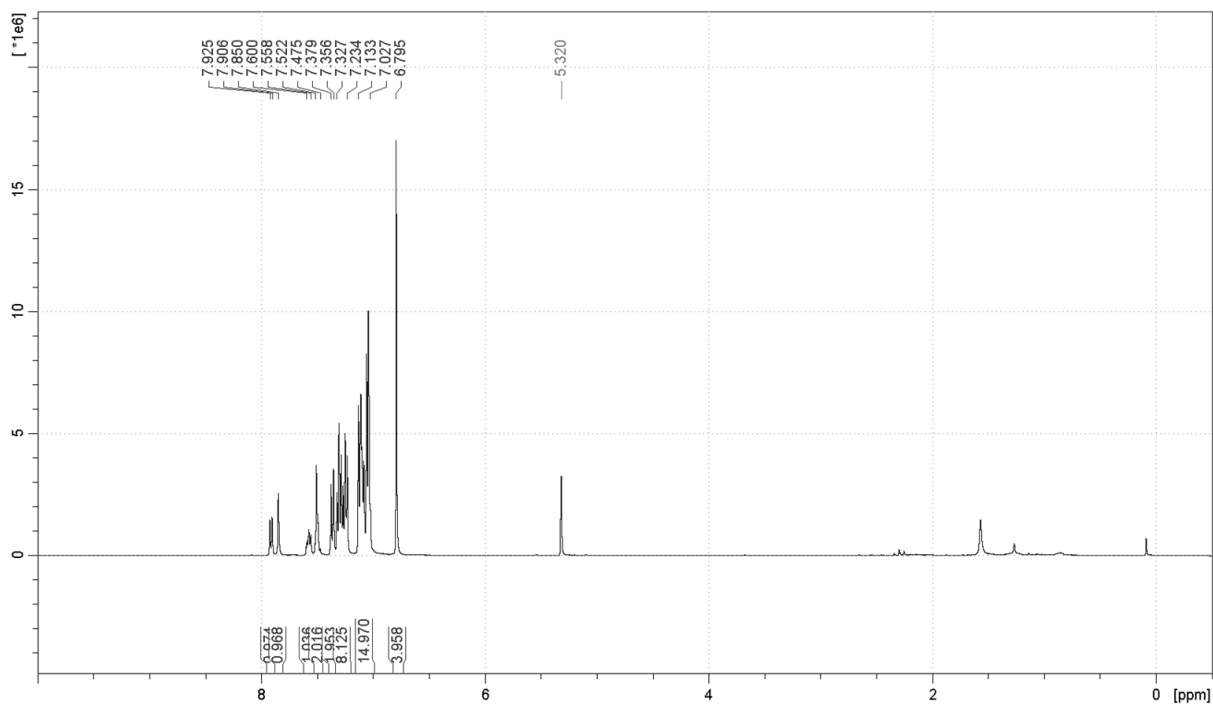

Figure S 5. Proton NMR spectrum of compound 3c.

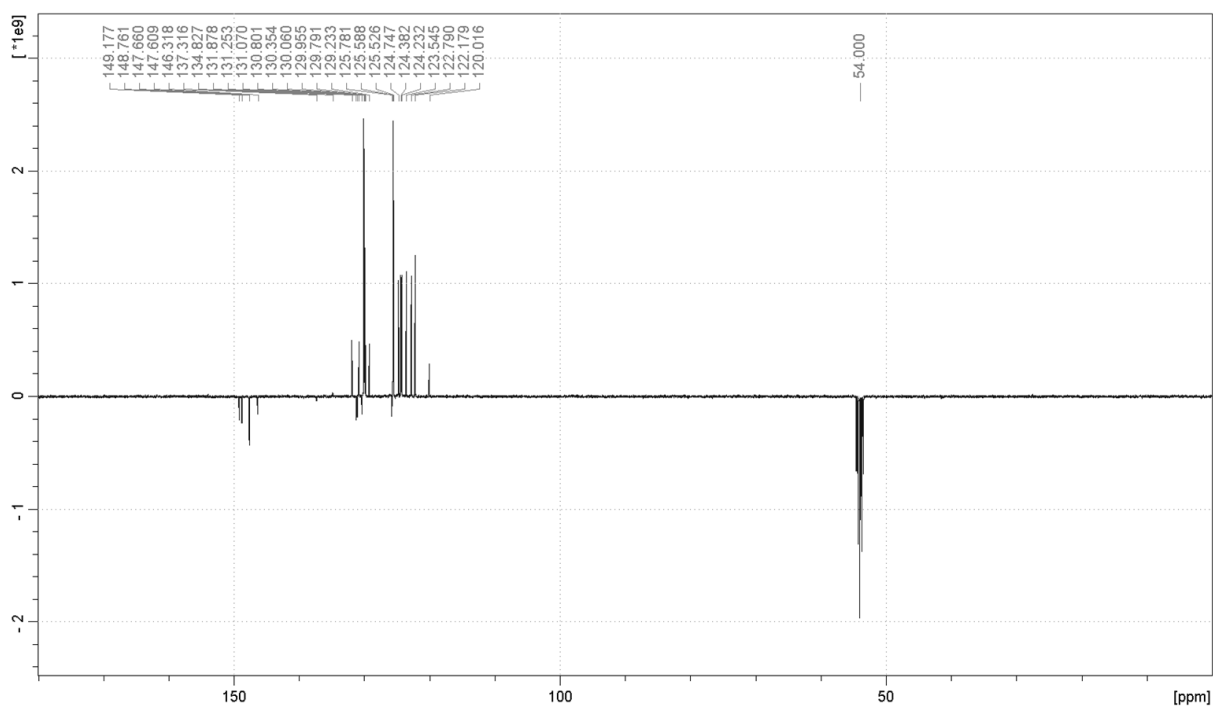

Figure S 6. Carbon NMR spectrum of compound 3c.

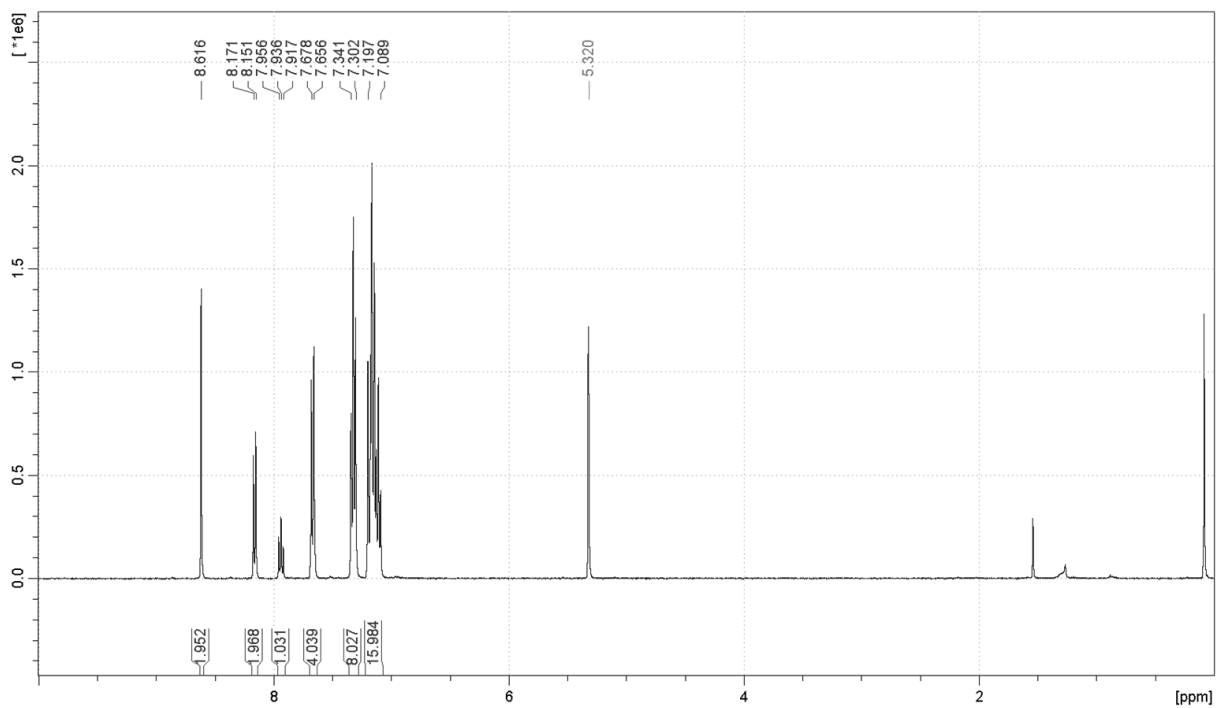

Figure S 7. Proton NMR spectrum of compound 3d.

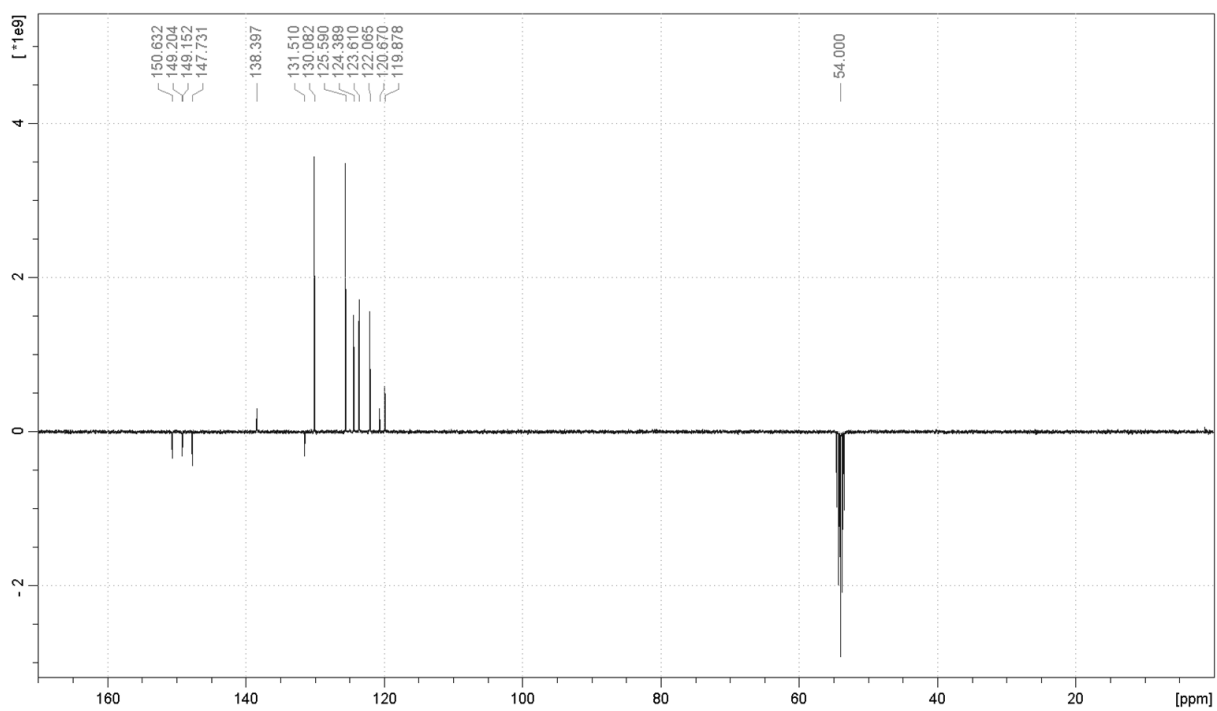

Figure S 8. Carbon NMR spectrum of compound 3d.

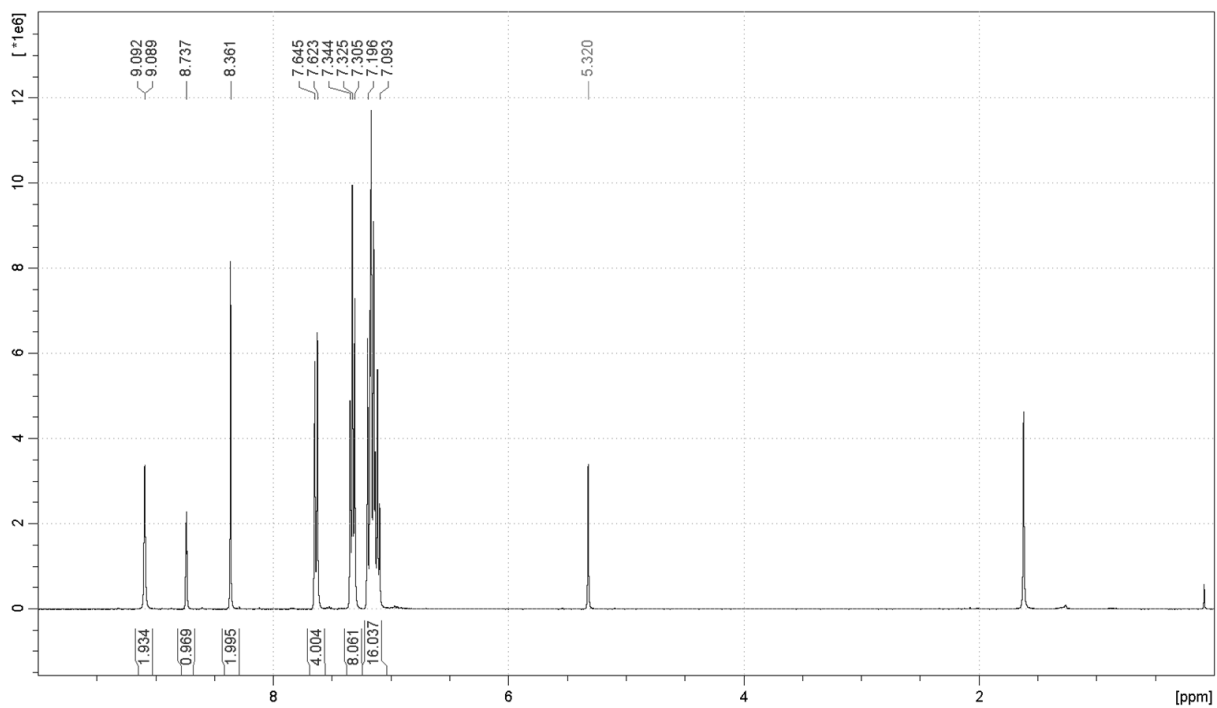

Figure S 9. Proton NMR spectrum of compound 3e.

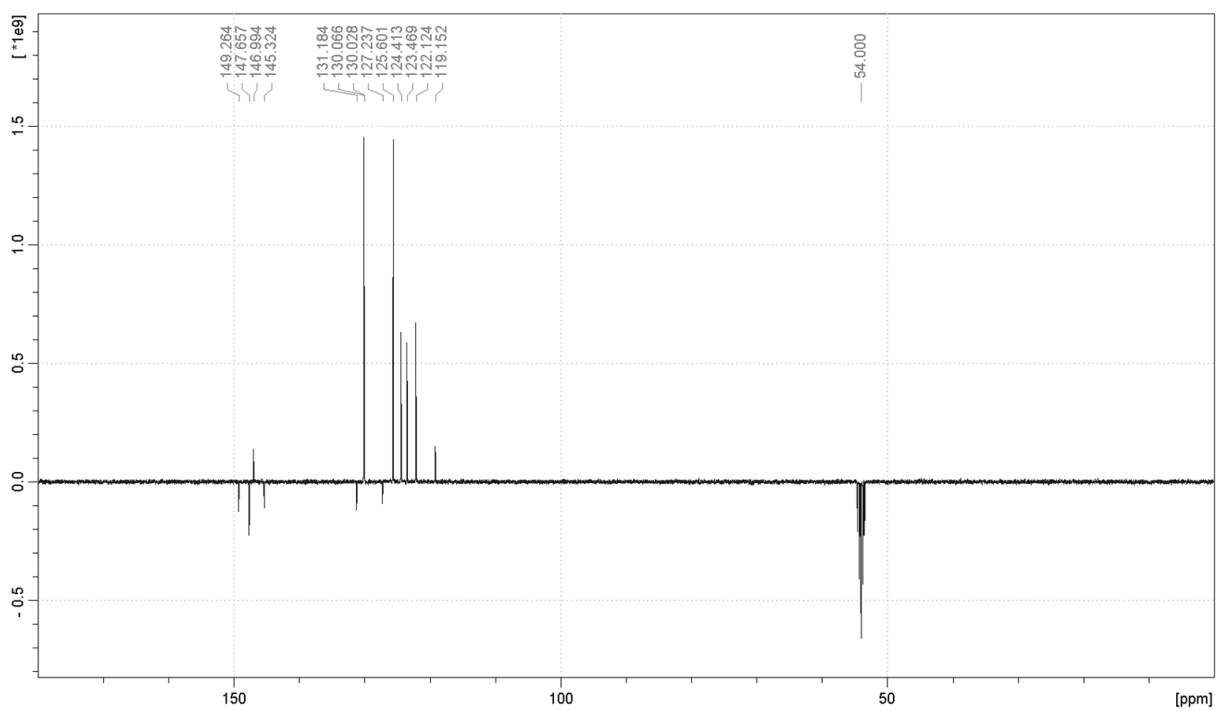

Figure S 10. Carbon NMR spectrum of compound 3e.

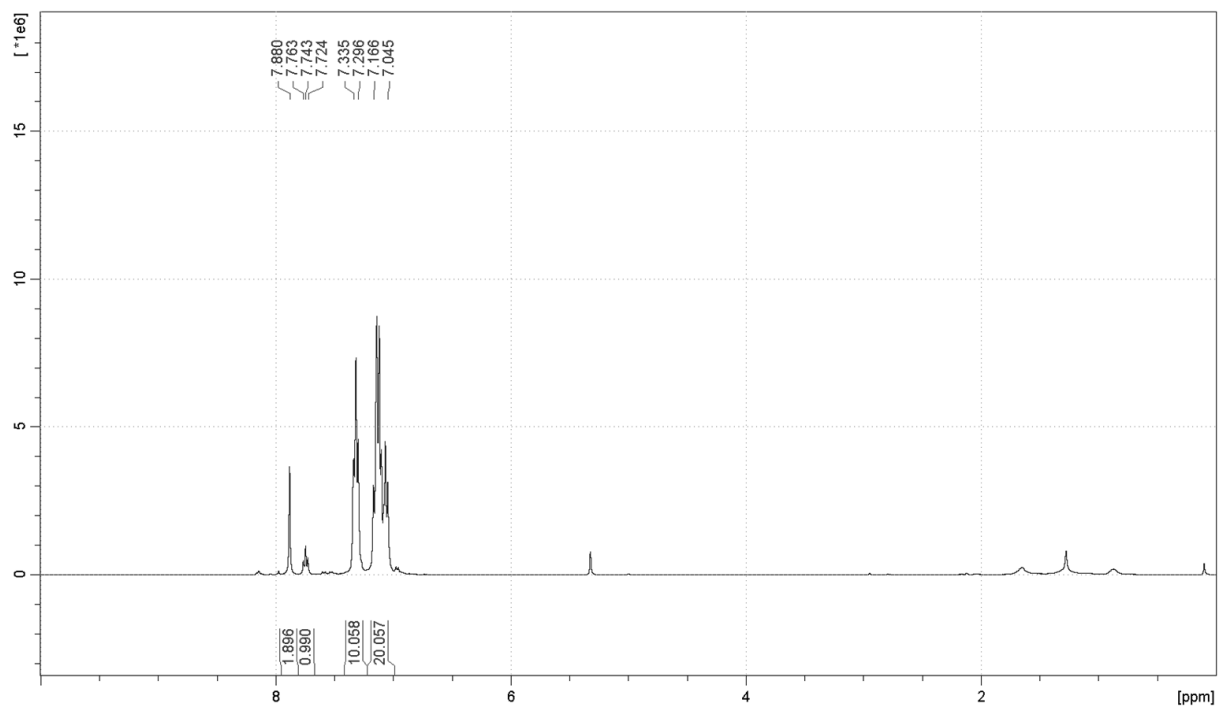

Figure S 11. Proton NMR spectrum of compound 4d.

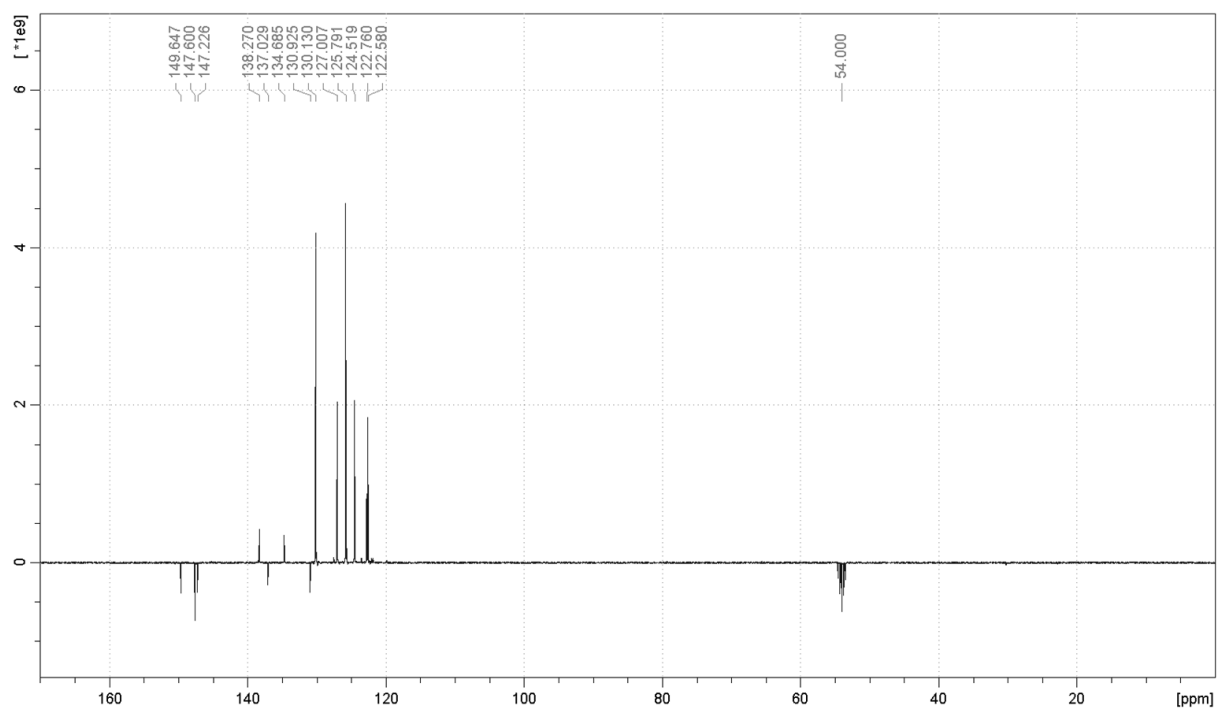

Figure S 12. Carbon NMR spectrum of compound 4d.

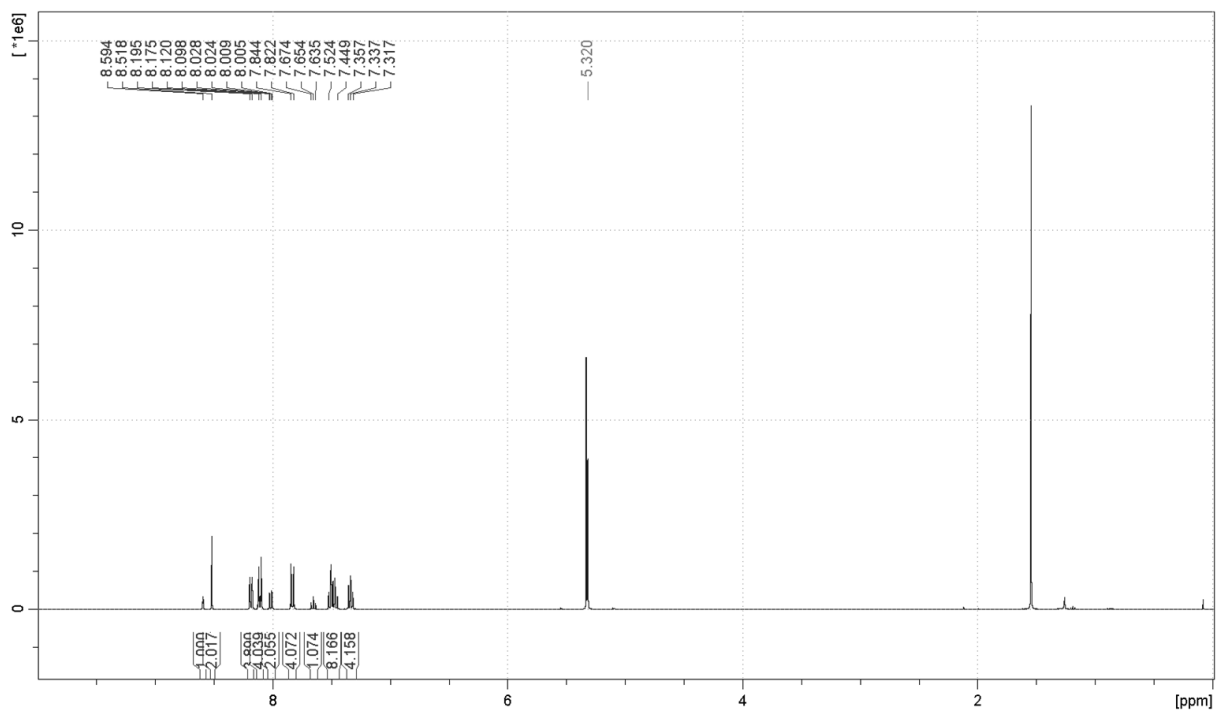

Figure S 13. Proton NMR spectrum of compound 5b.

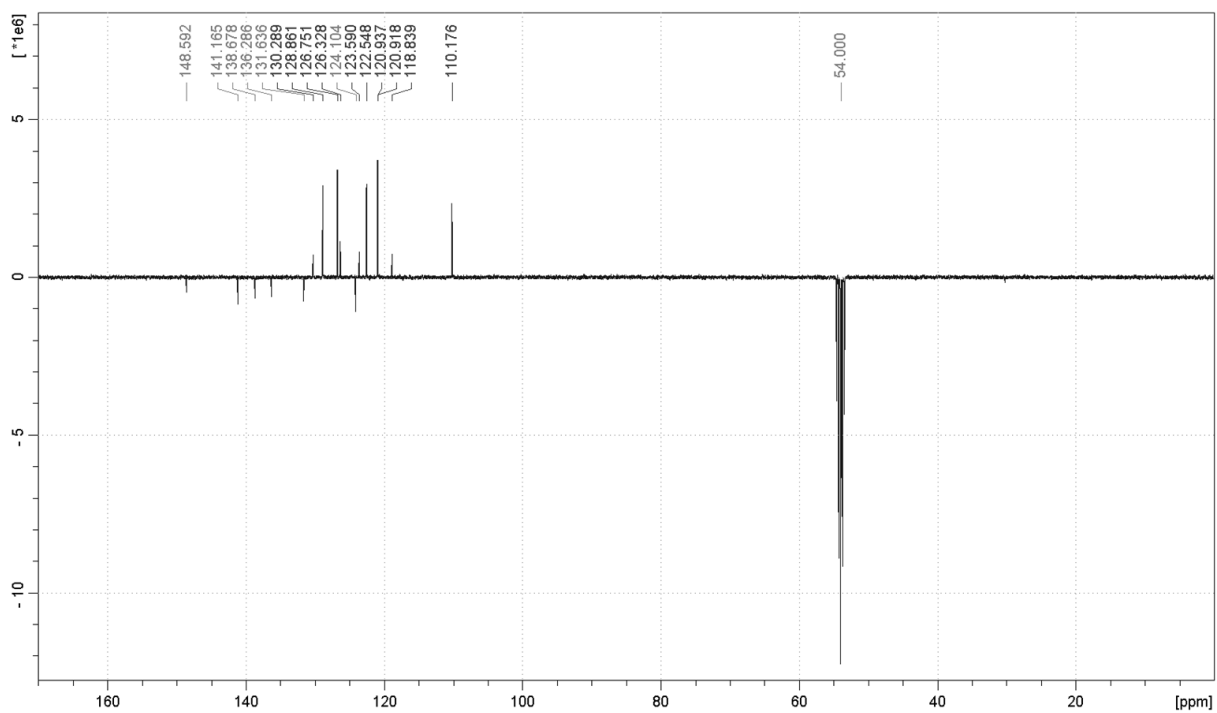

Figure S 14. Carbon NMR spectrum of compound 5b.



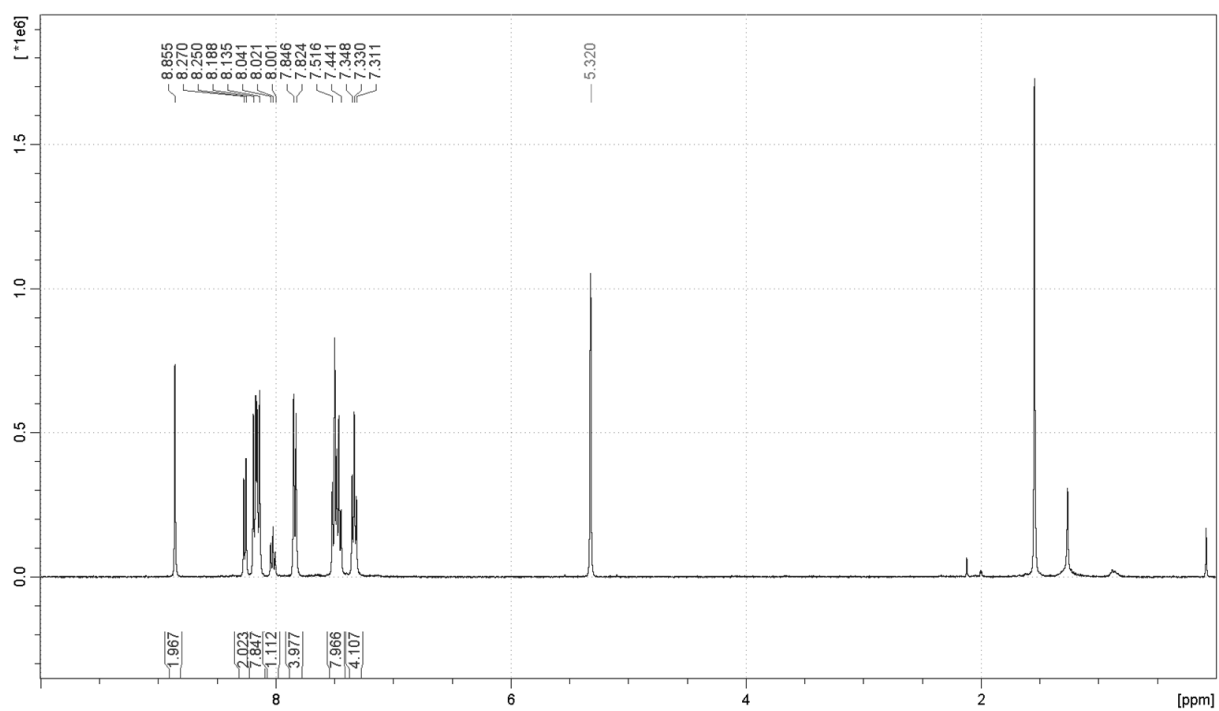

Figure S 15. Proton NMR spectrum of compound 5d.

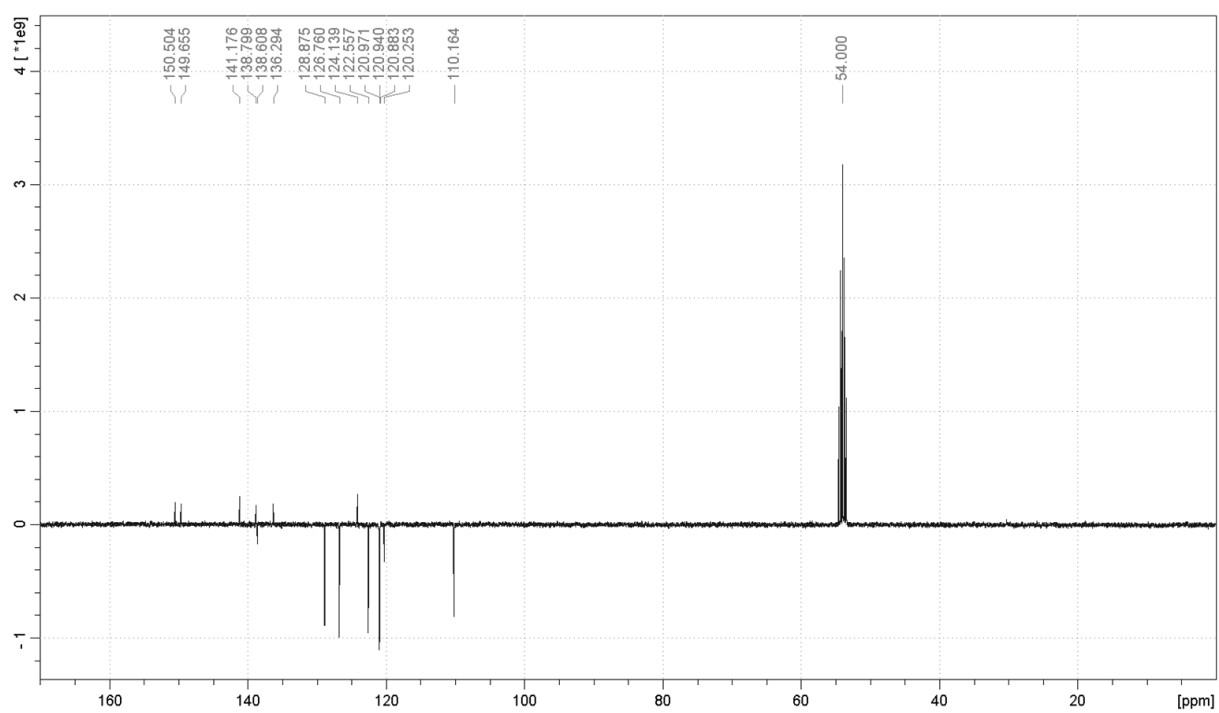

Figure S 16. Carbon NMR spectrum of compound 5d.

# TGA/DSC

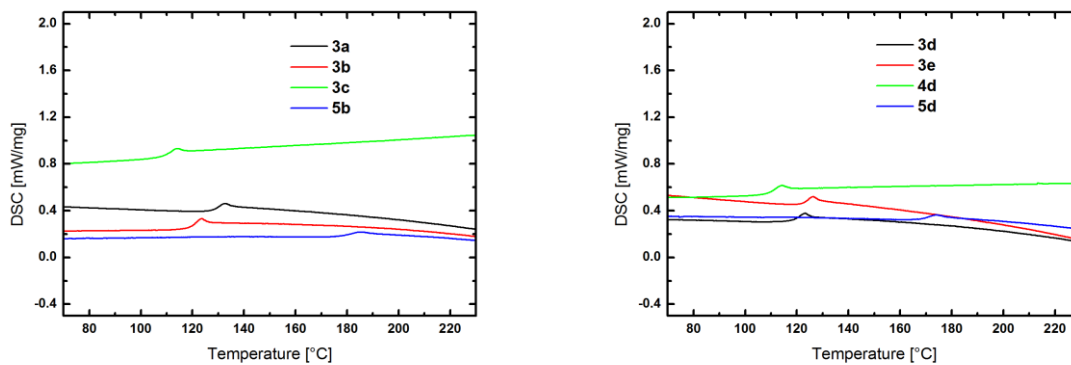

**Figure S 17.** DSC trace of the second heating cycle of **3a**, **3b**, **3c** and **5b** (left) and **3d**, **3e**, **4d** and **5d** (right) recorded at a heating rate of  $10\text{ °C min}^{-1}$ .

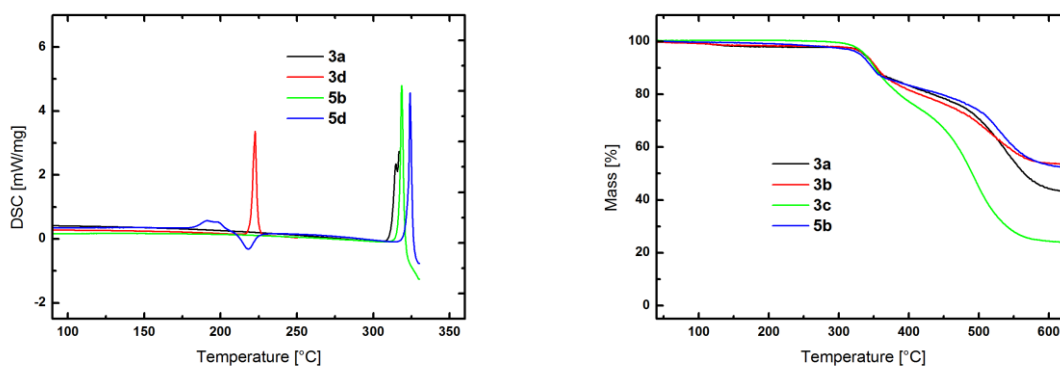

**Figure S 18.** DSC trace of the first heating cycle of **3a**, **3d**, **5b** and **5d** (left) and TGA trace of **3a**, **3b**, **3c** and **5b** (right) recorded at a heating rate of  $10\text{ °C min}^{-1}$ .

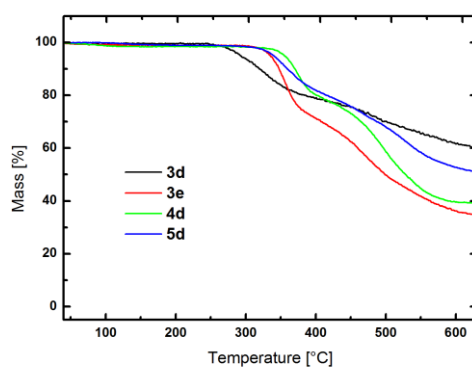

**Figure S 19.** TGA trace of **3d**, **3e**, **4d** and **5d** (right) recorded at a heating rate of  $10\text{ °C min}^{-1}$ .

## Cyclic voltammetry

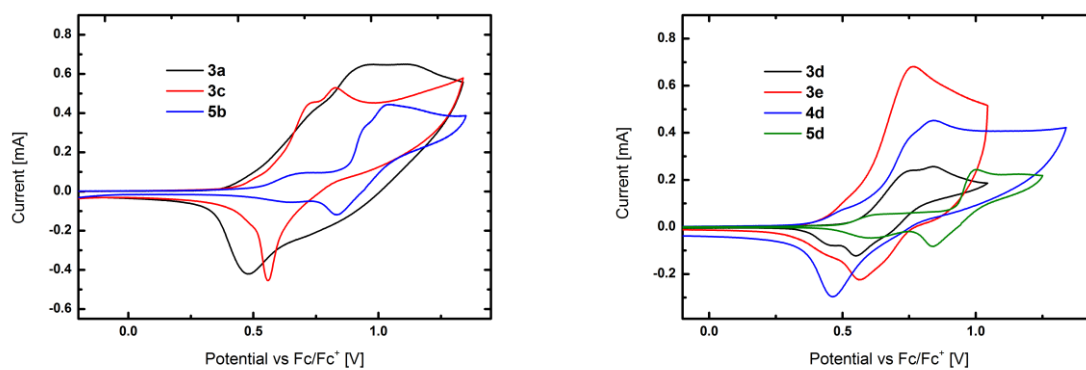

Figure S 20. CV curves of **3a**, **3c** and **5b** (left) and **3d**, **3e**, **4d** and **5d** (right).

## Theoretical calculations

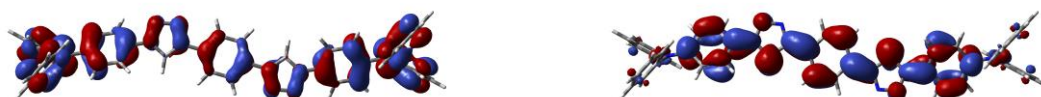

Figure S 21. Spatial distribution of the HOMO (left) and LUMO (right) of **3a**.

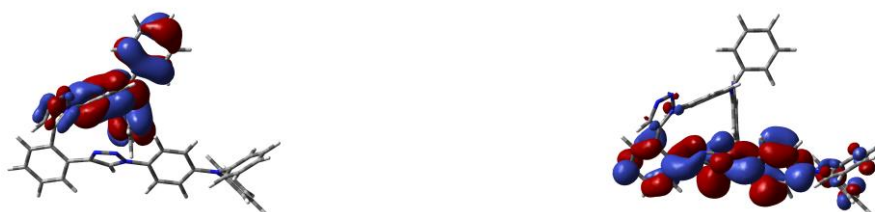

Figure S 22. Spatial distribution of the HOMO (left) and LUMO (right) of **3c**.

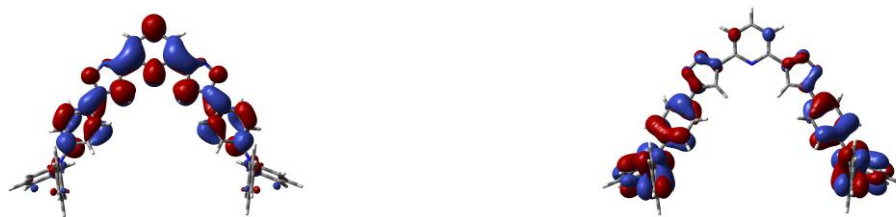

**Figure S 23.** Spatial distribution of the HOMO (left) and LUMO (right) of **3d**.

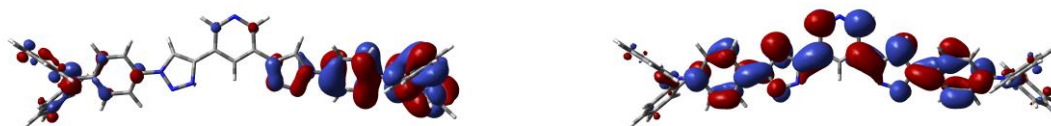

**Figure S 24.** Spatial distribution of the HOMO (left) and LUMO (right) of **3e**.

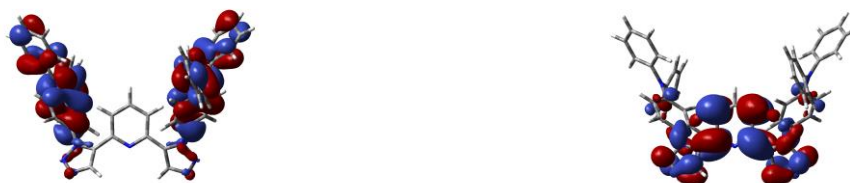

**Figure S 25.** Spatial distribution of the HOMO (left) and LUMO (right) of **4d**.

# EL spectra

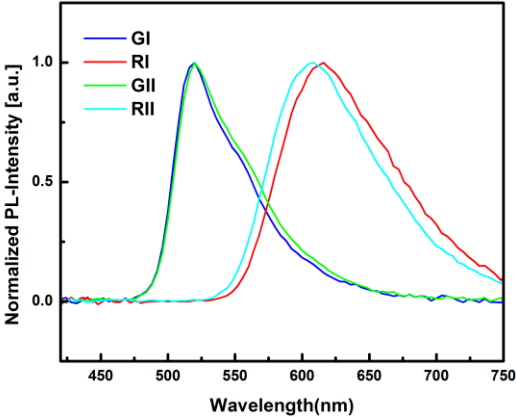

Figure S 26. EL spectra of devices RI, RII, GI and GII.
